# Supplementary material for: Coiled-coil heterodimers with increased stability for cellular regulation and sensing SARS-CoV-2 spike protein-mediated cell fusion
Source: PubMed Central journal article supplement (PMC8080620; doi:10.1038/s41598-021-88315-3), 2021-04-28
Supplement: 41598_2021_88315_MOESM1_ESM.pdf [file 41598_2021_88315_MOESM1_ESM.pdf]

## **Coiled-coil heterodimers with increased stability for cellular regulation and sensing SARS-CoV-2 spike protein-mediated cell fusion**

Short: **Highly stable heterodimeric parallel coiled coils**

Tjaša Plaper<sup>1,3</sup>, Jana Aupič<sup>1</sup>, Petra Dekleva<sup>1</sup>, Fabio Lapenta<sup>1,2</sup>, Mateja Manček Keber<sup>1</sup>, Roman Jerala<sup>1,2,\*</sup>, Mojca Benčina<sup>1,2,\*</sup>

**Corresponding authors.** Roman Jerala, [roman.jerala@ki.si](mailto:roman.jerala@ki.si), +38614760335; Mojca Benčina, [mojca.bencina@ki.si](mailto:mojca.bencina@ki.si), +38614760334; (both) National Institute of Chemistry, Hajdrihova 19, SI-1001 Ljubljana, Slovenia, Fax: +38614760300.

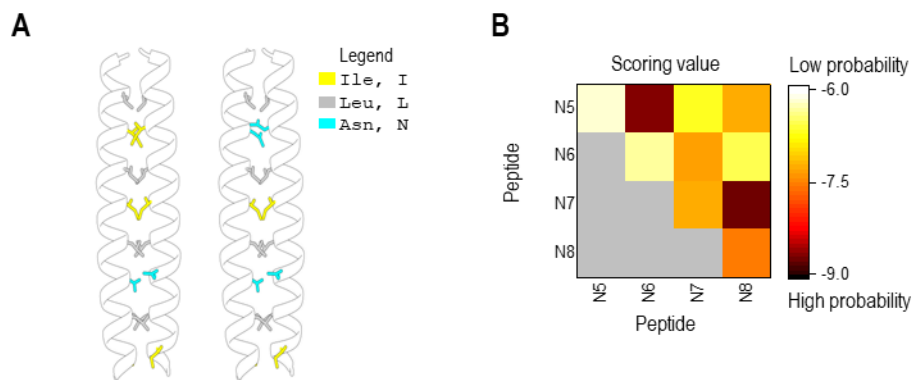

**Figure S1.** (A) Structural models of N7:N8 and P7A:P8A peptides built by the ISAMBARD modeling package. Selected amino acid side chains are shown for clarity. Polar amino acid residue Asn (cyan) is present at the  $\alpha$  position of the second heptad of the N7, N8 (left). In P7A and P8A (right), additional Asn is placed at the  $\alpha$  position of the fourth heptad. (B) Predicted orthogonality and interactions between all peptide pairs using a scoring algorithm<sup>31</sup>. The pairs, N5:N6 and N7:N8, were predicted to form CCs with higher stability.

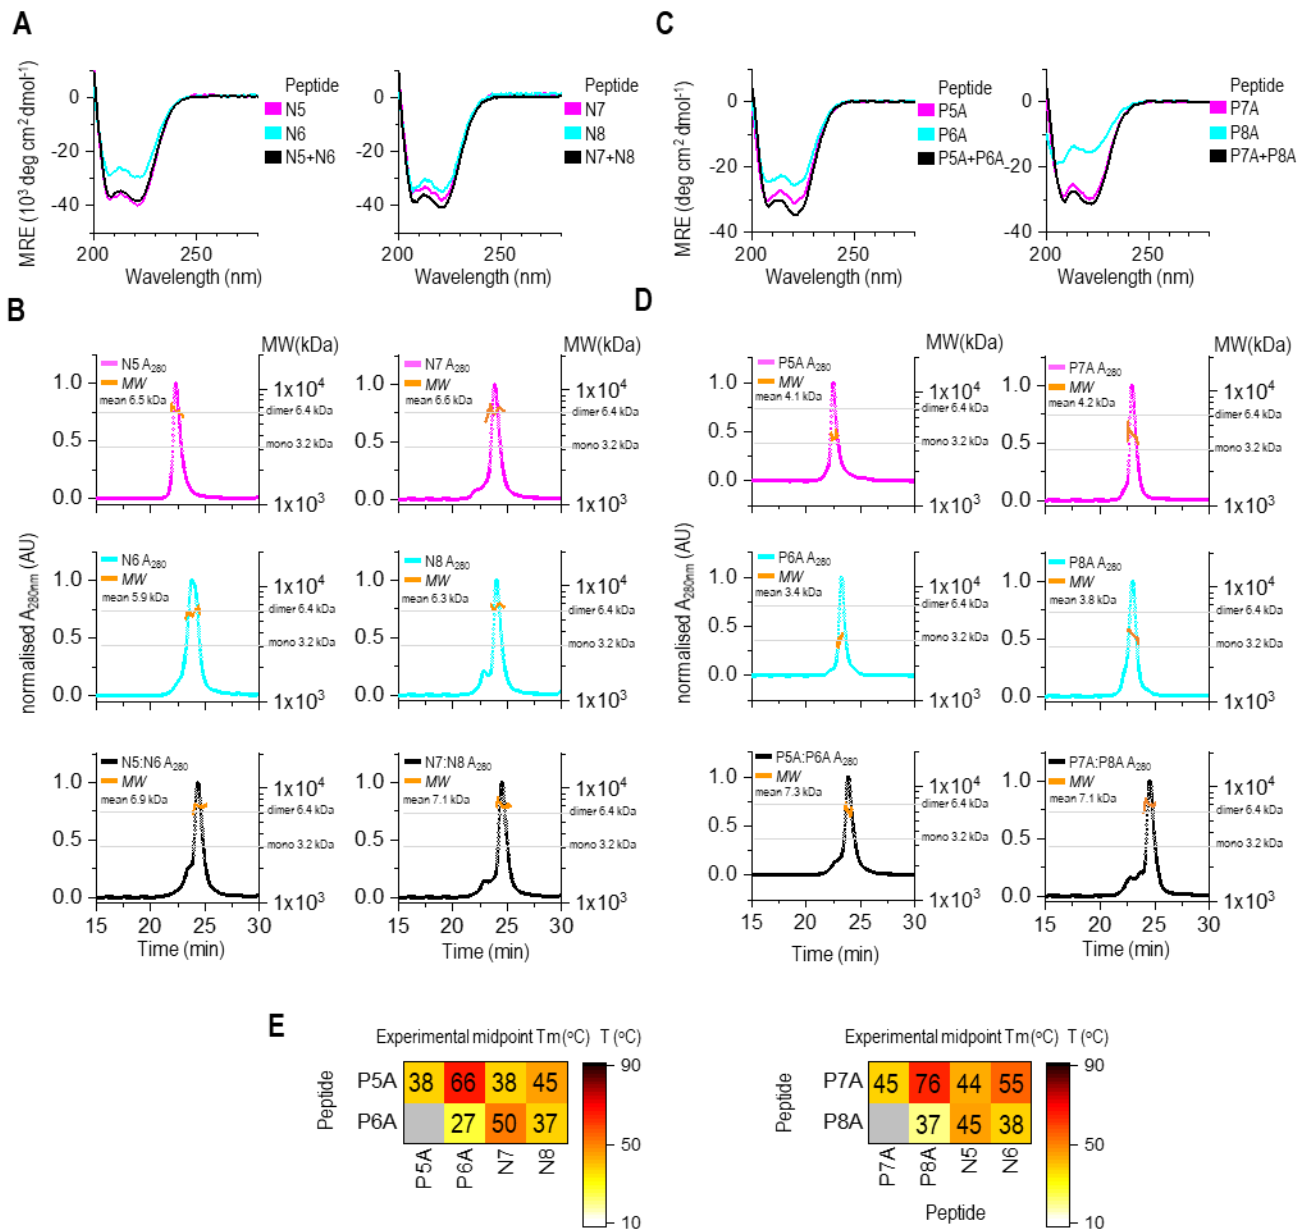

**Figure S2.** (A,C) Circular dichroism (CD) spectra of a 1:1 mixture of CC, N5:N6 and N7:N8 pairs, and P5A:P6A and P7A:P8A pairs (20  $\mu\text{M}$  each, black). Single peptides (40  $\mu\text{M}$ ) are shown in cyan and magenta. The peptides and peptide mixtures resemble the characteristic  $\alpha$ -helical spectrum at 20  $^\circ\text{C}$ . The designated peptide partners exhibited a higher helical content than the peptides alone, indicating peptides' intrinsic preference for binding to their designated partners. All data were measured in Tris buffer. (B,D) Multimerization state of individual peptides and peptide pairs, N5:N6 and N7:N8, as determined by SEC-MALS. Size-exclusion chromatograms (normalized by setting the major peak maximum to 1) are presented with an overlay of the molecular weights (orange line) calculated from static light measurements. The dashed horizontal lines correspond to the expected molecular weights of a monomer and dimer. The SEC-MALS profiles of individual peptides confirm that the peptides P7A, P8A, P5A, and P6A are monomers in solution. (E) Heat map of the matrix of the calculated midpoint  $T_m$  from thermal denaturation scans of indicated peptide combinations.

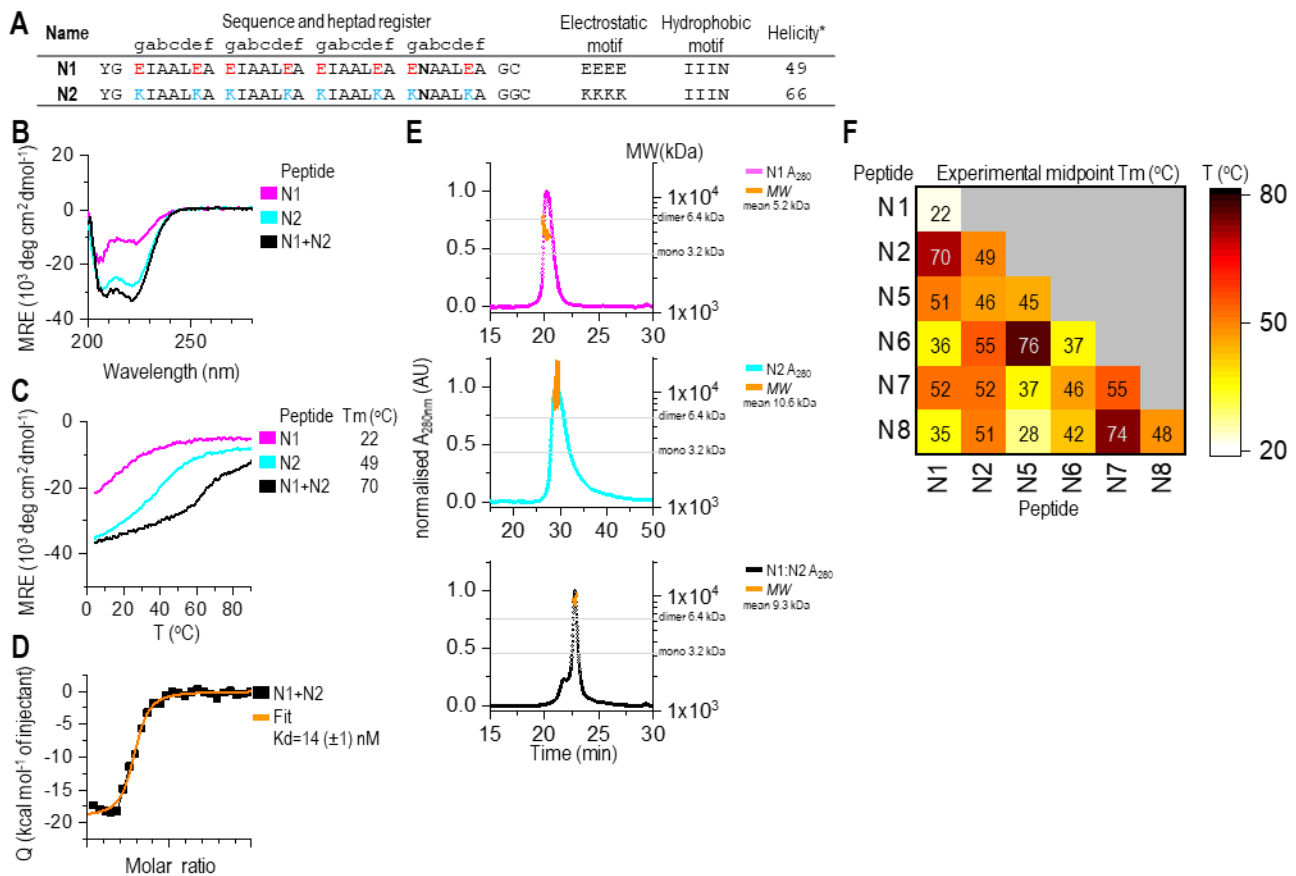

**Figure S3.** (A) Sequence of N1 and N2 peptides. (B) Circular dichroism (CD) spectra of a 1:1 mixture of CC, N1:N2 pairs (20  $\mu$ M each, black). Single peptides (40  $\mu$ M) are shown in cyan and magenta. The peptides and peptide mixtures resemble the characteristic  $\alpha$ -helical spectrum at 20  $^{\circ}$ C. All data were measured in Tris buffer. (C) Thermal denaturation profiles of peptides (40  $\mu$ M; magenta and cyan) and CCs (20  $\mu$ M each peptide; black) monitored by a CD signal at 222 nm. The midpoint Tm was calculated based on thermodynamic model fit<sup>34</sup>. (D) Isothermal titration calorimetry (ITC) analysis of the binding affinity of designated CC peptide pairs. The binding isotherms of heat release per injection are depicted as a function of the increasing peptide-to-peptide molar ratio. The dissociation constant,  $K_d^{ITC}$ , was calculated using the two-state dimer association model. (E) Multimerization state of individual peptides and peptide pairs, N1:N2, as determined by SEC-MALS. Size-exclusion chromatograms (normalized by setting the major peak maximum to 1) are presented with an overlay of the molecular weights (orange line) calculated from static light measurements. The dashed horizontal lines correspond to the expected molecular weights of a monomer and dimer. The SEC-MALS profiles of individual peptides confirm that the peptides are multimer in solution. (F) Heat map of the matrix of the calculated midpoint Tm from thermal denaturation scans of all peptide combinations.

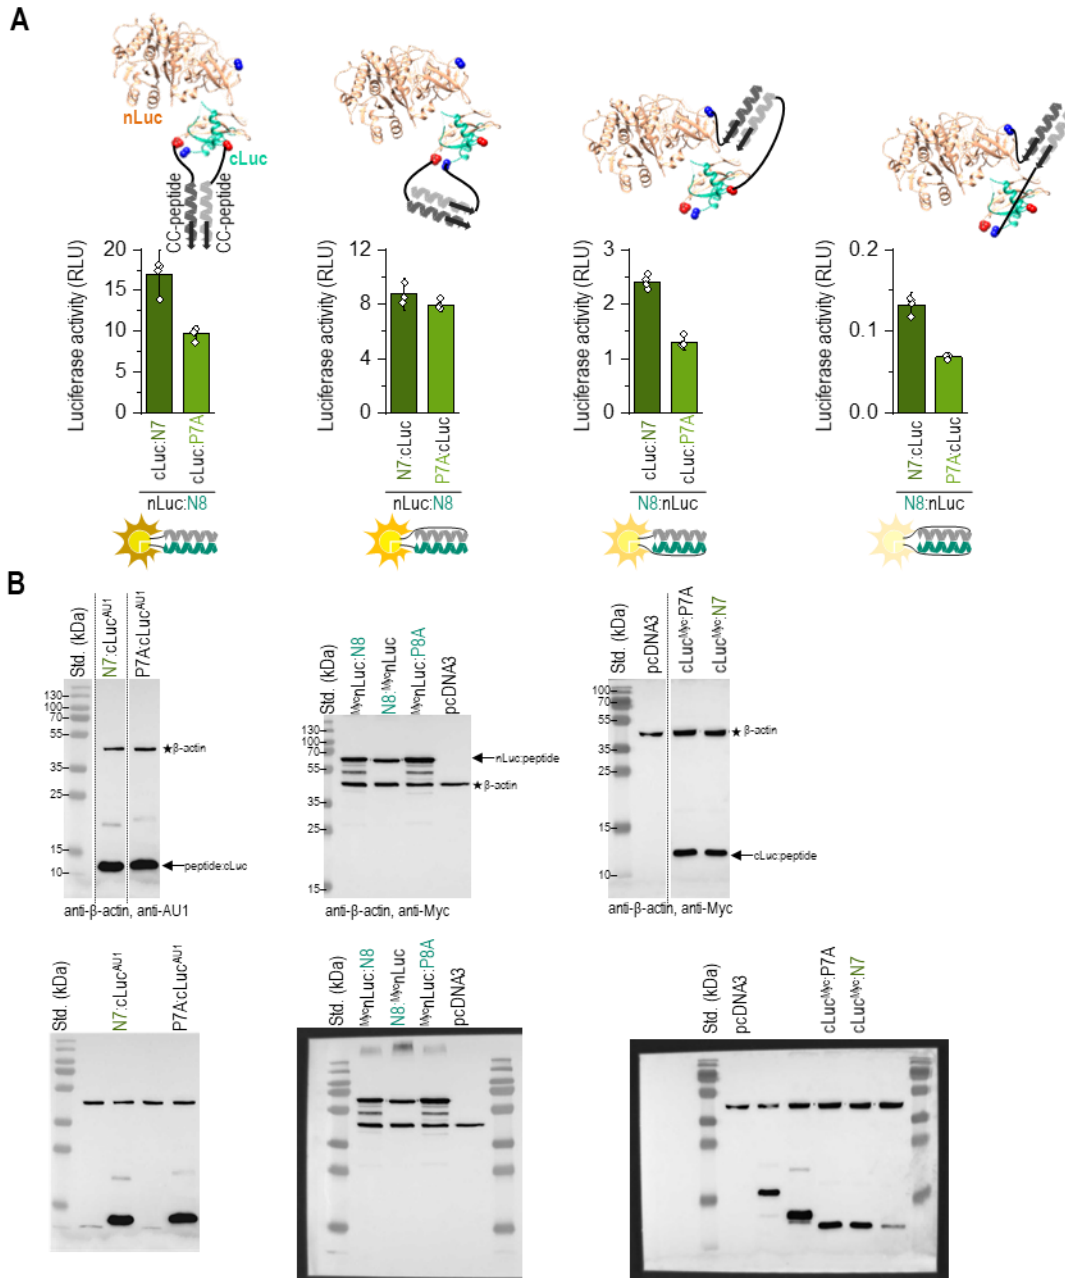

**Figure S4.** (A) Reconstitution of split luciferase in HEK293T cells. (Above) Schematic presentation of a structural model of split luciferase (brown nLuc and cyan cLuc) tethered to the N- or C-termini of the CC-forming peptide. *Note:* Linkers between CC peptides and N or C terminal of split luciferase have the same length. (Below) Luciferase activity of reconstituted CC-split luciferase 48 h after transfection of HEK293T cells with a plasmid expressing a combination of nLuc tethered to N8 (60 ng) and cLuc tethered to N7, or P7A peptides (30 ng). The values represent the means ( $\pm$  s.d.) from four independent cell cultures and are representative of two independent experiments. Amounts of used plasmids are indicated in **Table S2**. (B) Expression of CC-split luciferase determined by a western blot test. Proteins separated via SDS-PAGE were blotted on a nitrocellulose membrane and stained with anti-Myc, anti-HA, and anti- $\beta$ -actin antibodies as indicated. Lines indicate the groupings from different parts of the same gel (same exposure). Below: uncropped and unprocessed images of blots are shown.

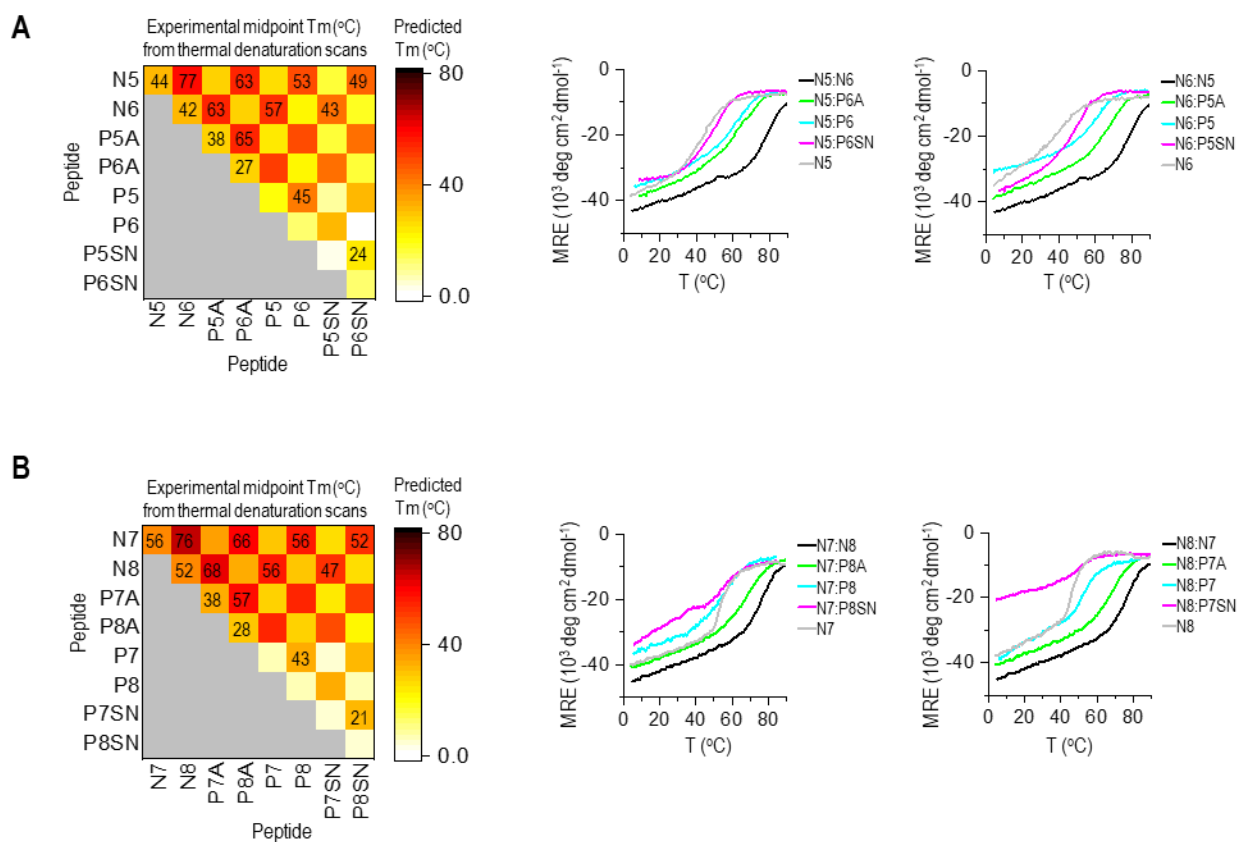

**Figure S5. (A, B)** The CC stability linear model<sup>34</sup> was used to predict the interactions between all possible peptide pairs. Predicted values are shown as a heat map. The experimental midpoint denaturation temperatures (T<sub>m</sub>) of CCs and individual CC-forming peptides determined from thermal denaturation scans monitored by the CD signal at 222 nm (right) are depicted on top of the heat map of predicted T<sub>m</sub> values.

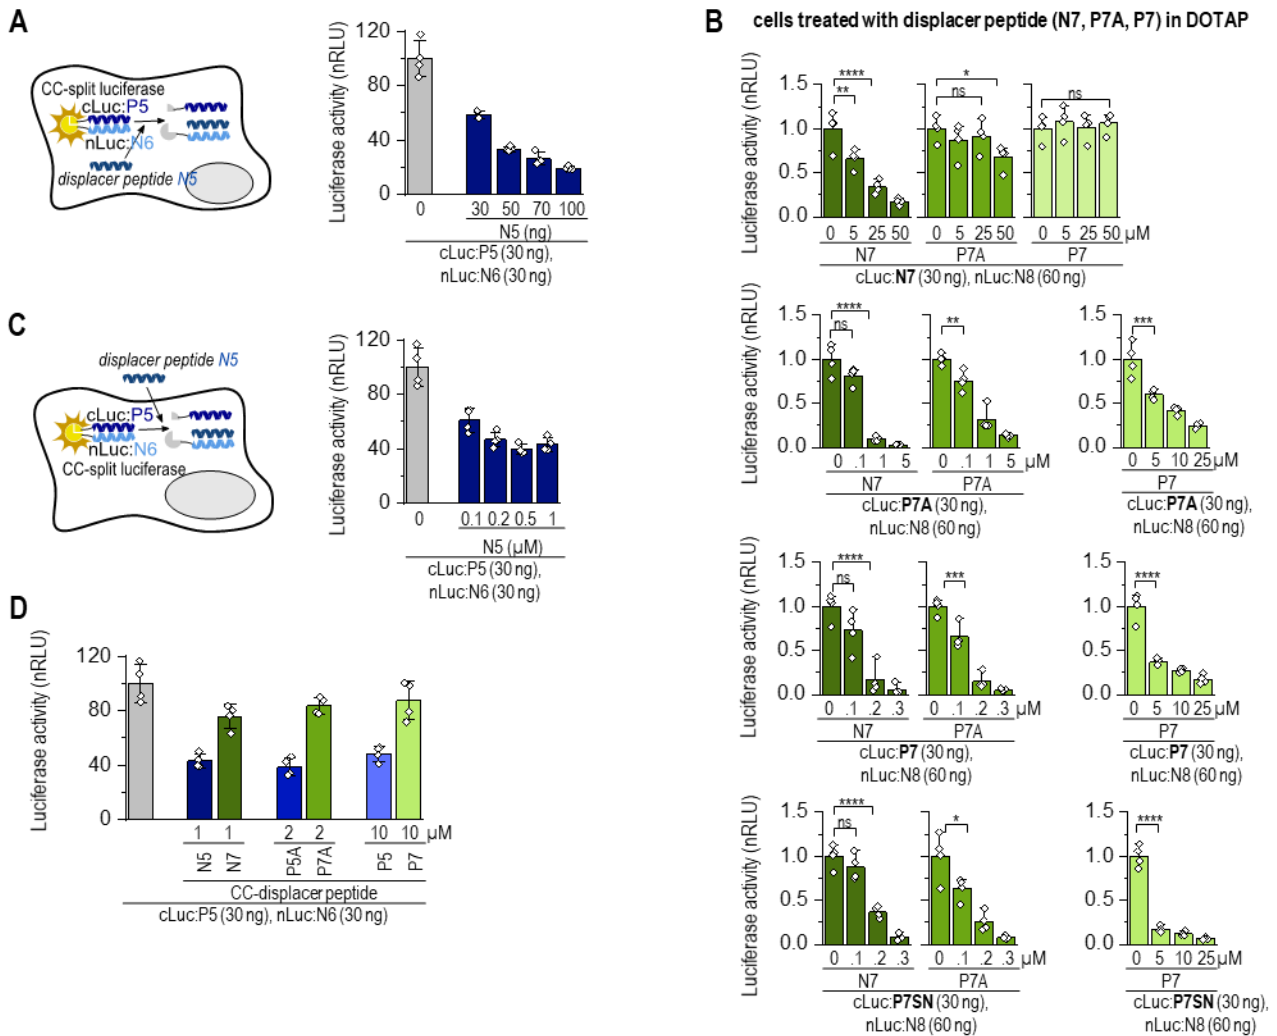

**Figure S6.** (A) Schematic representation of reconstituted N6:P5 split luciferase activity attenuated by N5 displacer peptide. Luciferase activity of HEK293T cells co-expressing cLuc:P5 (30 ng), nLuc:N6 (30 ng), and N5 displacer peptide (0-100 ng). (B) Luciferase activity of HEK293T cells transfected with plasmids expressing nLuc:N8 (60 ng) and cLuc tethered with N7, P7A, P7, or P7SN (30 ng). Forty-eight hours later, cells were treated with N7, P7A, or P7S displacer peptide (0–50 μM in DOTAP) for 2 h, and then luciferase activity was measured. (C) Schematic representation of reconstituted N6:P5 split luciferase activity attenuated by N5 displacer peptide, which was added to split luciferase-expressing cells. Luciferase activity of HEK293T cells (transfected with plasmids nLuc:N6 (30 ng) and cLuc tethered to P5 (30 ng)) treated with N5, P5A, P5, and P5SN peptide (0–1 μM in DOTAP) for 2 h. Cells were treated 48 h after transfection. The bars represent the means ( $\pm$ s.d.) from four independent cell cultures. (D) Luciferase activity of HEK293T cells (transfected with plasmids expressing nLuc:N6 (30 ng) and cLuc:P5 (30 ng)) treated with N7 or N5; P7A or P5A; P7 or P5 peptide (1, 2, or 10 μM in DOTAP) for 2 h. Cells were treated 48 h after transfection. The values (A-D) represent the means ( $\pm$  s.d.) from four independent cell cultures, individually transfected with the same mixture of plasmids, and are representative of two independent experiments. For amounts of plasmids, see **Table S2**. Statistical analyses and the corresponding p-values are listed in **Table S3**.

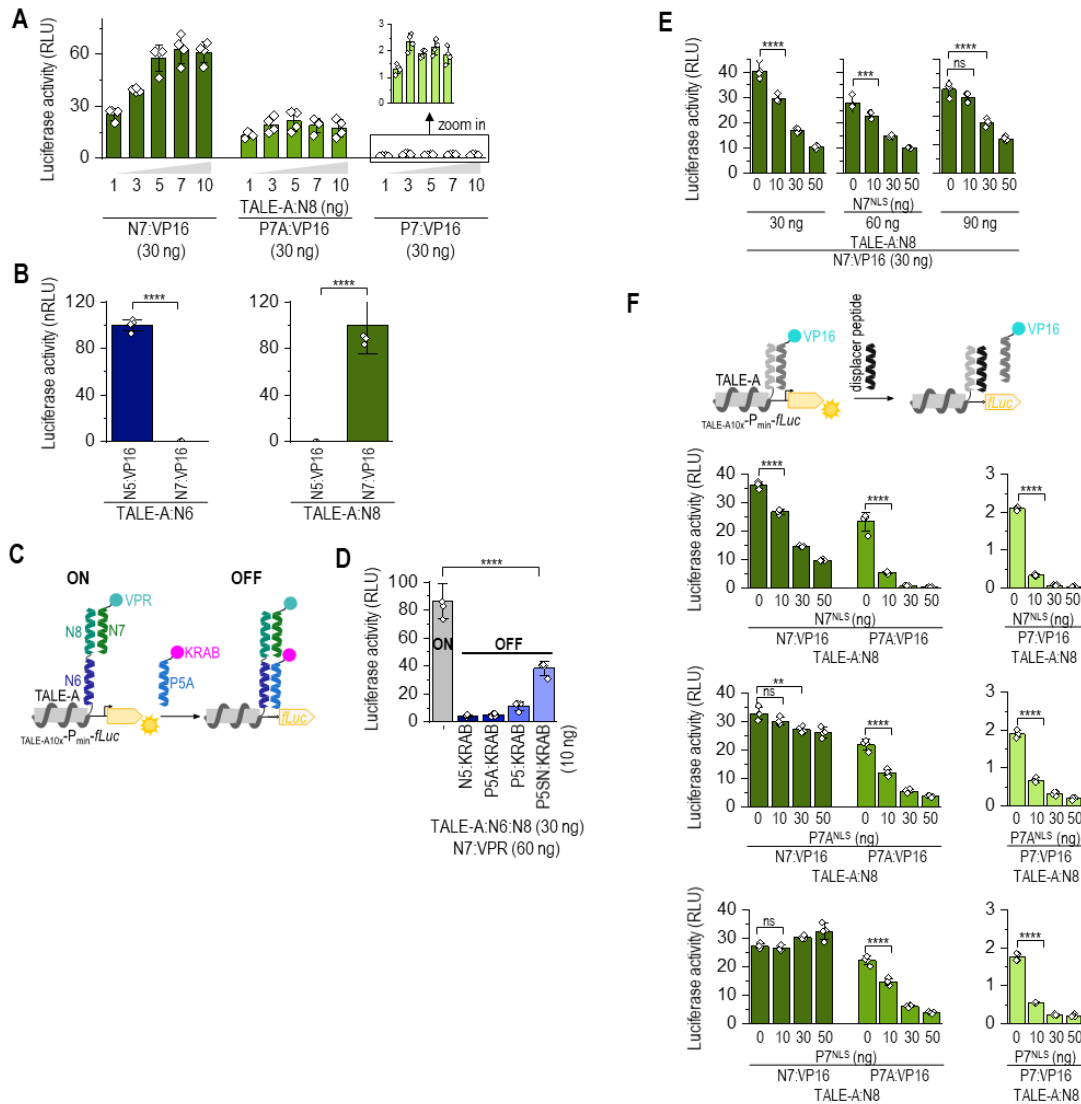

**Figure S7. Reconstitution of CC-split transcription factor attenuated with complementary CC-displacer peptide.** (A) Luciferase activity measured 48 h after transfection of HEK293T cells with plasmids expressing TALE-A:N8, CC:VP16 (30 ng) and the luciferase reporter. Zoom in depicts the reconstitution of TALE-A:N8 with P7:VP16 at more appropriate scale. (B) Reconstitution of CC-split transcription factor in HEK293T cells co-expressing TALE-A:N8 (30 ng); VP16 linked to N7 or N5 (30 ng) or TALE-A:N6 (30 ng) and VP16 linked to N5 or N7 (30 ng); and the luciferase reporter ( $T_{ALE10x}\text{-}P_{\text{min}}\text{-}fLuc$ ). Luciferase activity was measured 48 h after transfection. (C) Schematic representation of suppression of CC-split transcription factor activity (TALE-A:N6:N8-N7:VPR; ON state) by addition of CC:KRAB suppression domain (OFF state). (D) Suppression of CC-split transcription factor activity (TALE-A:N6:N8 (30 ng), N7:VPR (60 ng)) by addition of KRAB suppression domain linked to N5, P5A, P5, or P5SN (10 ng). Luciferase activity was measured 48 h after transfection. (E) The amount of DNA-binding domain (TALE-A:N8) has a minor impact on displacement efficacy. Luciferase activity in HEK293T cells was measured 48 h after co-transfection of plasmids expressing TALE-A:N8 (30, 60, 90 ng), N7:VP16 (30 ng), N7<sup>NLS</sup> (0-50 ng) and reporter luciferase. (F) CC stability and CC-displacer peptide helicity determine displacement efficacy. Luciferase activity determined 48 h after transfection of HEK293T cells with plasmids expressing TALE-A:N8 (30 ng); CC:VP16 (30 ng); a CC-displacer peptide (N7<sup>NLS</sup>, P7A<sup>NLS</sup> or P7<sup>NLS</sup>) (0-50 ng); and the reporter luciferase ( $T_{ALE10x}\text{-}P_{\text{min}}\text{-}fLuc$ ). The values (A,B,D-F) represent the means ( $\pm$  s.d.) from four independent cell cultures, individually transfected with the same mixture of plasmids, and are representative of two independent experiments. For amounts of plasmids, see Table S2. Statistical analyses and the corresponding p-values are listed in Table S3.



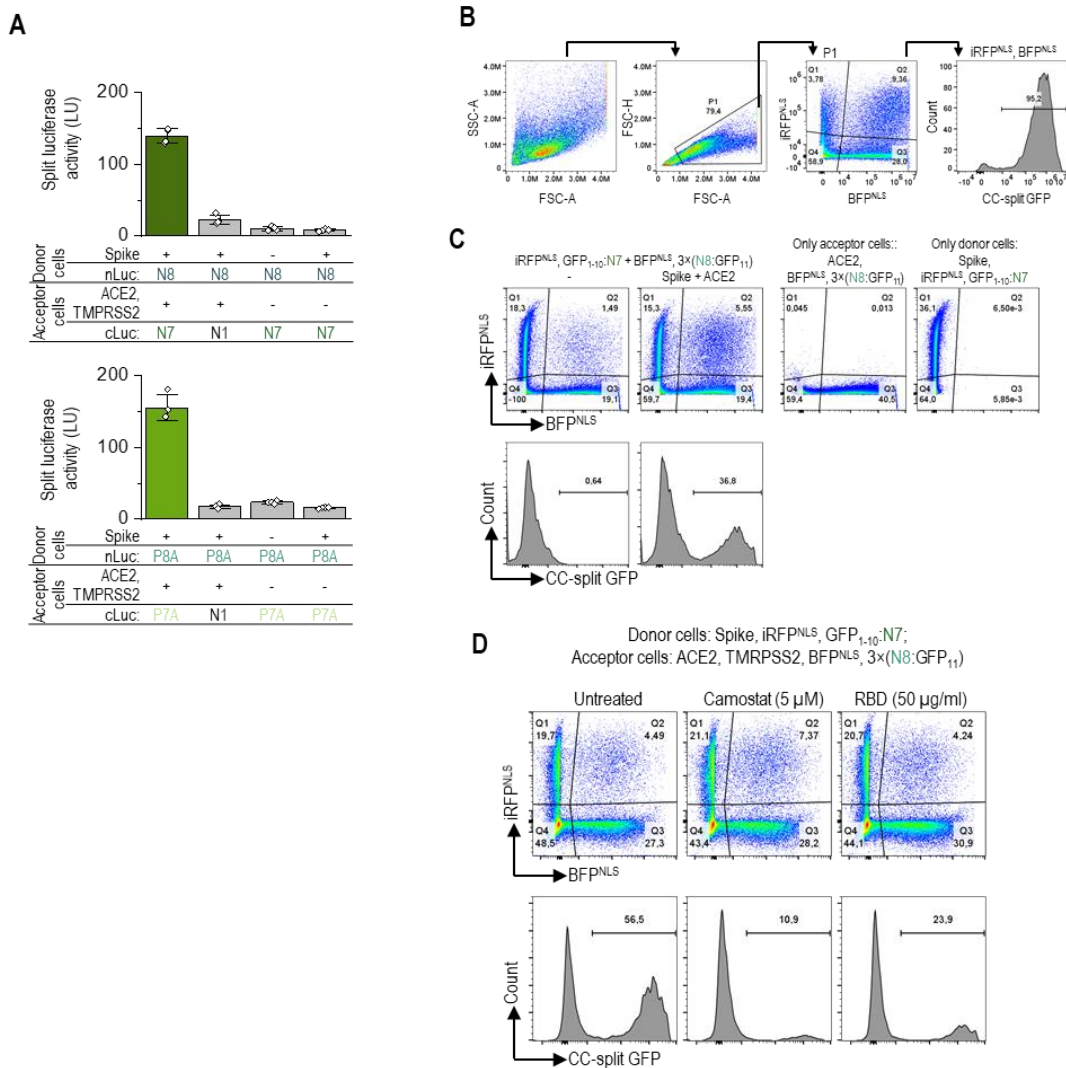

**Figure S8.** (A) Luciferase activity as an indicator of cell fusion. 24 h after transfection, donor and acceptor HEK293T cells were mixed in 1:1 ratio. Luciferase activity (A) was measured 3 h later. The values represent the means ( $\pm$  s.d.) from four independent cell cultures, individually transfected with the same mixture of plasmids, and are representative of two independent experiments. Donor HEK293T cells were transfected with plasmids expressing nLuc:N8 (1000 ng), with or without CoV-2 Spike-protein (10 ng) and acceptor cells expressing cLuc:N7 or cLuc:N1 as a control (1000 ng), TMPRSS2 (30 ng) with or without ACE2 (20 ng). (B) Flow cytometry gating strategy. The population of cells presented as pseudocolor plot (FCS-A/FCS-H) was gated for singlets and syncytia. The subset of cells, the BFP and iRFP positive, were analyzed for reconstituted CC-split GFP. The same gating strategy was used for **Fig 5E**, **Fig 6E**, and **Fig S8C**, **S8D**. (C) Flow cytometry analysis 3 h after mixing donor and acceptor cells. Formation of cell-cell fusion with split GFP reporter (GFP<sub>1-10</sub>:N7; 3×(N8:GFP<sub>11</sub>)) was analyzed from the double BFP and iRFP positive subset of cells and presented as histogram of split GFP positive cells. Donor cells were transfected with plasmid expressing the iRFP<sup>NLS</sup> (50 ng), and GFP<sub>1-10</sub>:N7 (500 ng) with or without SARS CoV-2 Spike protein (50 ng), and the acceptor cells were expressing BFP<sup>NLS</sup> (50 ng), and 3×(N8:GFP<sub>11</sub>) (650 ng), with or without ACE2 receptor (250 ng). (D) Flow cytometry analysis of a mixture of donor cells expressing the SARS CoV-2 Spike protein (50 ng), iRFP<sup>NLS</sup> (50 ng), and GFP<sub>1-10</sub>:N7 (500 ng) and the acceptor cells expressing ACE2 receptor (250 ng), TMPRSS2 (50 ng), BFP<sup>NLS</sup> (50 ng), and 3×(N8:GFP<sub>11</sub>) (650 ng). Formation of cell-cell fusion with split GFP reporter (GFP<sub>1-10</sub>:N7; 3×(N8:GFP<sub>11</sub>)) was analyzed from the populations of cells positive for iRFP and BFP. Histograms present percent of reconstituted split GFP for double iRFP and BFP positive 3 h after mixing donor and acceptor cells. Representative results of two independent experiments are shown. For amounts of plasmids, see **Table S2**.

**Table S1.** Sequences of orthogonal 5:6 and 7:8 N- and P-type peptides.

| Name       | Sequence and heptad register                                                  |                                                  |                                           |                                                  | Electrostatic motif | Hydrophobic motif                   | Helicity* |    |
|------------|-------------------------------------------------------------------------------|--------------------------------------------------|-------------------------------------------|--------------------------------------------------|---------------------|-------------------------------------|-----------|----|
|            | gabcdef                                                                       | gabcdef                                          | gabcdef                                   | gabcdef                                          |                     |                                     |           |    |
| <b>N7</b>  | Y <b>E</b> I <b>A</b> A <b>L</b> E <b>A</b>                                   | <b>K</b> <b>N</b> A <b>A</b> L <b>K</b> A        | <b>E</b> I <b>A</b> A <b>L</b> E <b>A</b> | <b>K</b> I <b>A</b> A <b>L</b> K <b>A</b>        | GC                  | <b>E</b> <b>K</b> <b>E</b> <b>K</b> | INII      | 65 |
| <b>P7A</b> | Y <b>G</b> <b>E</b> I <b>A</b> A <b>L</b> E <b>A</b>                          | <b>K</b> <b>N</b> A <b>A</b> L <b>K</b> A        | <b>E</b> I <b>A</b> A <b>L</b> E <b>A</b> | <b>K</b> <b>N</b> A <b>A</b> L <b>K</b> A        | GC                  | <b>E</b> <b>K</b> <b>E</b> <b>K</b> | ININ      | 43 |
| P7         | <b>S</b> <b>P</b> <b>E</b> <b>D</b> <b>E</b> I <b>Q</b> A <b>L</b> E <b>E</b> | <b>K</b> <b>N</b> A <b>Q</b> L <b>K</b> <b>Q</b> | <b>E</b> I <b>A</b> A <b>L</b> E <b>E</b> | <b>K</b> <b>N</b> <b>Q</b> A <b>L</b> K <b>Y</b> | G                   | <b>E</b> <b>K</b> <b>E</b> <b>K</b> | ININ      | 13 |
| P7SN       | <b>E</b> I <b>Q</b> <b>Q</b> L <b>E</b> E                                     | <b>K</b> <b>N</b> <b>S</b> Q <b>L</b> K <b>Q</b> | <b>E</b> I <b>S</b> Q <b>L</b> E <b>E</b> | <b>K</b> <b>N</b> <b>Q</b> E <b>L</b> K <b>Y</b> | G                   | <b>E</b> <b>K</b> <b>E</b> <b>K</b> | ININ      | 3  |
| <b>N8</b>  | Y <b>K</b> I <b>A</b> A <b>L</b> K <b>A</b>                                   | <b>E</b> <b>N</b> A <b>A</b> L <b>E</b> A        | <b>K</b> I <b>A</b> A <b>L</b> K <b>A</b> | <b>E</b> I <b>A</b> A <b>L</b> E <b>A</b>        | GC                  | <b>K</b> <b>E</b> <b>K</b> <b>E</b> | INII      | 59 |
| <b>P8A</b> | Y <b>G</b> <b>K</b> I <b>A</b> A <b>L</b> K <b>A</b>                          | <b>E</b> <b>N</b> A <b>A</b> L <b>E</b> A        | <b>K</b> I <b>A</b> A <b>L</b> K <b>A</b> | <b>E</b> <b>N</b> A <b>A</b> L <b>E</b> A        | GGC                 | <b>K</b> <b>E</b> <b>K</b> <b>E</b> | ININ      | 38 |
| P8         | <b>S</b> <b>P</b> <b>E</b> <b>D</b> <b>K</b> I <b>A</b> Q <b>L</b> <b>K</b> E | <b>E</b> <b>N</b> Q <b>Q</b> L <b>E</b> Q        | <b>K</b> I <b>Q</b> A <b>L</b> K <b>E</b> | <b>E</b> <b>N</b> A <b>A</b> L <b>E</b> Y        | G                   | <b>K</b> <b>E</b> <b>K</b> <b>E</b> | ININ      | 11 |
| P8SN       | <b>K</b> I <b>S</b> E <b>L</b> K <b>E</b>                                     | <b>E</b> <b>N</b> Q <b>Q</b> L <b>E</b> Q        | <b>K</b> I <b>Q</b> Q <b>L</b> K <b>E</b> | <b>E</b> <b>N</b> S <b>Q</b> L <b>E</b> Y        | G                   | <b>K</b> <b>E</b> <b>K</b> <b>E</b> | ININ      | 4  |
| <b>N5</b>  | Y <b>E</b> I <b>A</b> A <b>L</b> E <b>A</b>                                   | <b>K</b> I <b>A</b> A <b>L</b> K <b>A</b>        | <b>K</b> <b>N</b> A <b>A</b> L <b>K</b> A | <b>E</b> I <b>A</b> A <b>L</b> E <b>A</b>        | GC                  | <b>E</b> <b>K</b> <b>K</b> <b>E</b> | IINI      | 61 |
| <b>P5A</b> | Y <b>G</b> <b>E</b> <b>N</b> A <b>A</b> L <b>E</b> A                          | <b>K</b> I <b>A</b> A <b>L</b> K <b>A</b>        | <b>K</b> <b>N</b> A <b>A</b> L <b>K</b> A | <b>E</b> I <b>A</b> A <b>L</b> E <b>A</b>        | GC                  | <b>E</b> <b>K</b> <b>K</b> <b>E</b> | NINI      | 51 |
| P5         | <b>S</b> <b>P</b> <b>E</b> <b>D</b> <b>E</b> <b>N</b> A <b>A</b> L <b>E</b> E | <b>K</b> I <b>A</b> Q <b>L</b> K <b>Q</b>        | <b>K</b> <b>N</b> A <b>A</b> L <b>K</b> E | <b>E</b> I <b>Q</b> A <b>L</b> E <b>Y</b>        | G                   | <b>E</b> <b>K</b> <b>K</b> <b>E</b> | NINI      | 20 |
| P5SN       | <b>E</b> <b>N</b> S <b>Q</b> L <b>E</b> E                                     | <b>K</b> I <b>S</b> Q <b>L</b> K <b>Q</b>        | <b>K</b> <b>N</b> S <b>E</b> L <b>K</b> E | <b>E</b> I <b>Q</b> Q <b>L</b> E <b>Y</b>        | G                   | <b>E</b> <b>K</b> <b>K</b> <b>E</b> | NINI      | 4  |
| <b>N6</b>  | Y <b>K</b> I <b>A</b> A <b>L</b> K <b>A</b>                                   | <b>E</b> I <b>A</b> A <b>L</b> E <b>A</b>        | <b>E</b> <b>N</b> A <b>A</b> L <b>E</b> A | <b>K</b> I <b>A</b> A <b>L</b> K <b>A</b>        | GC                  | <b>K</b> <b>E</b> <b>E</b> <b>K</b> | IINI      | 60 |
| <b>P6A</b> | Y <b>G</b> <b>K</b> <b>N</b> A <b>A</b> L <b>K</b> A                          | <b>E</b> I <b>A</b> A <b>L</b> E <b>A</b>        | <b>E</b> <b>N</b> A <b>A</b> L <b>E</b> A | <b>K</b> I <b>A</b> A <b>L</b> K <b>A</b>        | GGC                 | <b>K</b> <b>E</b> <b>E</b> <b>K</b> | NINI      | 45 |
| P6         | <b>S</b> <b>P</b> <b>E</b> <b>D</b> <b>K</b> <b>N</b> A <b>A</b> L <b>K</b> E | <b>E</b> I <b>Q</b> A <b>L</b> E <b>E</b>        | <b>E</b> <b>N</b> Q <b>A</b> L <b>E</b> E | <b>K</b> I <b>A</b> Q <b>L</b> K <b>Y</b>        | G                   | <b>K</b> <b>E</b> <b>E</b> <b>K</b> | NINI      | 16 |
| P6SN       | <b>K</b> <b>N</b> S <b>E</b> L <b>K</b> E                                     | <b>E</b> I <b>Q</b> Q <b>L</b> E <b>E</b>        | <b>E</b> <b>N</b> Q <b>Q</b> L <b>E</b> E | <b>K</b> I <b>S</b> E <b>L</b> K <b>Y</b>        | G                   | <b>K</b> <b>E</b> <b>E</b> <b>K</b> | NINI      | 4  |

Legend: negative and positive amino acid residues are indicated with red and blue letters, respectively; asparagine is bolded;

\* indicates that the value was calculated according to the method described by Agadir et al. <sup>32</sup>.

**Table S2. Amounts of transfected plasmids for HEK293T cells in each well of a multi-well plate.** The empty pcDNA3 plasmid vector was used to equalize total DNA amounts up to 250 ng (for 96-well plate), 2500 ng (for 6-well plate), 1000 ng (for 8- and 12-well plate).

| Input plasmids                           | Amount [ng] | Input plasmids                                        | Amount [ng] | Input plasmids                                                            | Amount [ng] | Input plasmids                           | Amount [ng] |
|------------------------------------------|-------------|-------------------------------------------------------|-------------|---------------------------------------------------------------------------|-------------|------------------------------------------|-------------|
| <b>Figure 1G (96-well plate)</b>         |             | <b>Figure 3E, S6B (96-well plate)</b>                 |             | <b>Figure 5B, 6B, 6D, S8A</b>                                             |             | <b>Figure S4A (96-well plate)</b>        |             |
| cLuc:N7, or N7:cLuc                      | 30          | cLuc:N7, cLuc:P7A, cLuc:P7, or cLuc:P7SN              | 30          | <b>Acceptor cells (6-well plate)</b>                                      |             | cLuc:N7, cluc:P7A, N7:cLuc, or P7A:cLuc  | 30          |
| nLuc:N8, or N8:nLuc                      | 30          | nLuc:N8                                               | 60          | ACE2                                                                      | 0, 20       | nLuc:N8, or N8:nLuc                      | 60          |
| phRL-TK                                  | 5           | phRL-TK                                               | 5           | TMRSS2                                                                    | 0, 30       | phRL-TK                                  | 5           |
| <b>Figures 1H, 1I (96-well plate)</b>    |             | <b>Figure 3G (96-well plate)</b>                      |             | <b>Donor cells (6-well plate)</b>                                         |             | <b>Figure S6A (96-well plate)</b>        |             |
| cLuc:N7, cLuc:P7A, cLuc:N5, or cLuc:P5A  | 10-70       | cLuc:P7                                               | 10          | nLuc:N8, or nLuc:P8A                                                      | 1000        | cLuc:P5                                  | 30          |
| nLuc:N8, or nLuc:N6                      | 30          | nLuc:N8                                               | 30          | S-protein                                                                 | 0, 10       | N5                                       | 0-100       |
| phRL-TK                                  | 5           | phRL-TK                                               | 5           | <b>Figure 5D</b>                                                          |             | nLuc:N6                                  | 30          |
| <b>Figure 1J (96-well plate)</b>         |             | <b>Figure 4B (96-well plate)</b>                      |             | <b>Acceptor cells (8-well plate)</b>                                      |             | phRL-TK                                  | 5           |
| cLuc:N7, cluc:N5, cLuc:P7A, or cLuc:P5A  | 30          | TALE-A:NLS:N8, or TALE-A:NLS:N6                       | 30          | N8:GFP <sub>11</sub> , 3x(N8:GFP <sub>11</sub> ), or P8:GFP <sub>11</sub> | 100         | <b>Figure S6C, S6D (96-well plate)</b>   |             |
| nLuc:N8, or nLuc:N6                      | 30          | N7:NLS:VP16, N5:NLS:VP6, P7A:NLS:VP16 or P5A:NLS:VP16 | 1-100       | ACE2                                                                      | 40          | cLuc:P5                                  | 30          |
| phRL-TK                                  | 5           | phRL-TK                                               | 5           | TMRSS2                                                                    | 40          | nLuc:N6                                  | 30          |
| <b>Figures 2A, 2B (96-well plate)</b>    |             | <b>Figure 4D (96-well plate)</b>                      |             | BFP <sup>NLS</sup>                                                        | 120         | phRL-TK                                  | 5           |
| cLuc:N7, cLuc:P7A, cLuc:P7, or cLuc:P7SN | 10-90       | TALE-A:NLS:N6:N8                                      | 30          | <b>Donor cells (8-well plate)</b>                                         |             | <b>Figure S7A (96-well plate)</b>        |             |
| cLuc:P5A, cLuc:P5, or cLuc:P5SN          | 10-90       | N7:VP16                                               | 30          | S-protein                                                                 | 25          | TALE-A:NLS:N8                            | 1-10        |
| nLuc:N8, or nLuc:N6                      | 30          | N5:KRAB, P5A:KRAB, P5:KRAB, or P5SN:KRAB              | 0-3         | GFP <sub>1-10</sub> :N7, or GFP <sub>1-10</sub> :P7                       | 100         | N7:NLS:VP16, P7A:NLS:VP16 or P7:NLS:VP16 | 30          |
| phRL-TK                                  | 5           | phRL-TK                                               | 5           | mCherry <sup>NLS</sup>                                                    | 500         | phRL-TK                                  | 5           |
| <b>Figures 2C, 2D (96-well plate)</b>    |             | <b>Figure 4H (96-well plate)</b>                      |             | <b>Figure 5E, 6E, S8B, S8C, S8D (12-well plate)</b>                       |             | <b>Figure S7B (96-well plate)</b>        |             |
| cLuc:N7, cLuc:P7A, cLuc:P7, or cLuc:P7SN | 10          | TALE-A:NLS:N6:N8                                      | 30          | <b>Acceptor cells (12-well plate)</b>                                     |             | TALE-A:N8 or TALE-A:N6                   | 30          |
| cLuc:N5, cLuc:P5A, cLuc:P5, or cLuc:P5SN | 10          | N7:NLS:VP16                                           | 30          | N8:GFP <sub>11</sub> , 3x(N8:GFP <sub>11</sub> ), or P8:GFP <sub>11</sub> | 650         | N7:VP16 or N5:VP16                       | 30          |
| nLuc:N8, or nLuc:N6                      | 30          | P5:KRAB                                               | 1           | ACE2                                                                      | 250         | phRL-TK                                  | 5           |
| phRL-TK                                  | 5           | N5 <sup>NLS</sup> displacer peptide                   | 0-90        | TMRSS2                                                                    | 50          | <b>Figure S7E (96-well plate)</b>        |             |
| <b>Figure 3C (96-well plate)</b>         |             | phRL-TK                                               | 5           | BFP <sup>NLS</sup>                                                        | 50          | TALE-A:N8                                | 30, 60, 90  |
| cLuc:N7, cLuc:P7A, cLuc:P7, or cLuc:P7SN | 30          | <b>Figure 4F (96-well plate)</b>                      |             | <b>Donor cells (12-well plate)</b>                                        |             | N7:VP16                                  | 30          |
| nLuc:N8                                  | 60          | TALE-A:NLS:N6:N8                                      | 30          | S-protein                                                                 | 50          | P7A:VP16                                 | 30          |
| N7 displacer peptide                     | 0, 80, 155  | P7A:VP16                                              | 30          | GFP <sub>1-10</sub> :N7, or GFP <sub>1-10</sub> :P7,                      | 500         | P7:VP16                                  | 30          |
| phRL-TK                                  | 50          | N7 <sup>NLS</sup> displacer peptide                   | 0-70        | iRFP <sup>NLS</sup>                                                       | 50          | N7 <sup>NLS</sup>                        | 0-50        |
|                                          |             | phRL-TK                                               | 5           |                                                                           |             | P7 <sup>NLS</sup>                        | 0-50        |
|                                          |             |                                                       |             |                                                                           |             | phRL-TK                                  | 5           |
|                                          |             |                                                       |             |                                                                           |             | <b>Figure S7C (96-well plate)</b>        |             |
|                                          |             |                                                       |             |                                                                           |             | TALE-A:N6:N8                             | 30          |
|                                          |             |                                                       |             |                                                                           |             | N7:VPR                                   | 60          |
|                                          |             |                                                       |             |                                                                           |             | N5:KRAB                                  |             |
|                                          |             |                                                       |             |                                                                           |             | P5A:KRAB                                 |             |
|                                          |             |                                                       |             |                                                                           |             | P5:KRAB                                  | 10          |
|                                          |             |                                                       |             |                                                                           |             | P5SN:KRAB                                |             |
|                                          |             |                                                       |             |                                                                           |             | phRL-TK                                  | 5           |

**Table S3. Statistical analyses data.**

| Figures                                                   | Test details                                              | Significance                                              | Summary  | P-value  |
|-----------------------------------------------------------|-----------------------------------------------------------|-----------------------------------------------------------|----------|----------|
| Fig 3C                                                    | <b>One-way ANOVA; Dunnett's multiple comparisons test</b> |                                                           |          |          |
|                                                           | nLuc:N8 cLuc:N7; N7                                       |                                                           |          |          |
|                                                           | 0 vs. 80                                                  | No                                                        | ns       | 0.6788   |
|                                                           | 0 vs. 155                                                 | No                                                        | ns       | 0.2292   |
|                                                           | nLuc:N8 cLuc:P7A; N7                                      |                                                           |          |          |
|                                                           | 0 vs. 80                                                  | Yes                                                       | ****     | < 0,0001 |
|                                                           | 0 vs. 155                                                 | Yes                                                       | ****     | < 0,0001 |
|                                                           | nLuc:N8 cLuc:P7; N7                                       |                                                           |          |          |
|                                                           | 0 vs. 80                                                  | Yes                                                       | ****     | < 0,0001 |
|                                                           | 0 vs. 155                                                 | Yes                                                       | ****     | < 0,0001 |
| Fig 3E                                                    | <b>One-way ANOVA; Dunnett's multiple comparisons test</b> |                                                           |          |          |
|                                                           | cLuc:N7 nLuc:N8; N7                                       |                                                           |          |          |
|                                                           | 0 vs. 0.1                                                 | No                                                        | ns       | 0.9861   |
|                                                           | 0 vs. 0.2                                                 | No                                                        | ns       | 0.9997   |
|                                                           | 0 vs. 0.4                                                 | No                                                        | ns       | 0.8104   |
|                                                           | 0 vs. 1                                                   | No                                                        | ns       | > 0,9999 |
|                                                           | 0 vs. 2                                                   | No                                                        | ns       | 0.9997   |
|                                                           | 0 vs. 5                                                   | No                                                        | ns       | 0.5602   |
|                                                           | 0 vs. 10                                                  | Yes                                                       | **       | 0.0037   |
|                                                           | Fig S5B                                                   | <b>One-way ANOVA; Dunnett's multiple comparisons test</b> |          |          |
| cLuc:P7A nLuc:N8; N7                                      |                                                           |                                                           |          |          |
| 0 vs. n (for all tested amounts)                          |                                                           | Yes                                                       | ****     | < 0,0001 |
| cLuc:P7 nLuc:N8; N7                                       |                                                           |                                                           |          |          |
| 0 vs. n (for all tested amounts)                          |                                                           | Yes                                                       | ****     | < 0,0001 |
| cLuc:P7SN nLuc:N8; N7                                     |                                                           |                                                           |          |          |
| 0 vs. n (for all tested amounts)                          |                                                           | Yes                                                       | ****     | < 0,0001 |
| <b>One-way ANOVA; Dunnett's multiple comparisons test</b> |                                                           |                                                           |          |          |
| nLuc:N8 cLuc:N7; P7A                                      |                                                           |                                                           |          |          |
| 0 vs. 5                                                   |                                                           | Yes                                                       | **       | 0.0072   |
| 0 vs. 25                                                  | Yes                                                       | ****                                                      | < 0,0001 |          |
| 0 vs. 50                                                  | Yes                                                       | ****                                                      | < 0,0001 |          |
| Fig S5B                                                   | <b>One-way ANOVA; Dunnett's multiple comparisons test</b> |                                                           |          |          |
|                                                           | nLuc:N8 cLuc:N7; P7A                                      |                                                           |          |          |
|                                                           | 0 vs. 5                                                   | No                                                        | ns       | 0.5576   |
|                                                           | 0 vs. 25                                                  | No                                                        | ns       | 0.8284   |
|                                                           | 0 vs. 50                                                  | Yes                                                       | *        | 0.0445   |
|                                                           | nLuc:N8 cLuc:N7; P7                                       |                                                           |          |          |
|                                                           | 0 vs. 5                                                   | No                                                        | ns       | 0.7673   |
|                                                           | 0 vs. 25                                                  | No                                                        | ns       | 0.9968   |
|                                                           | 0 vs. 50                                                  | No                                                        | ns       | 0.8588   |
|                                                           | nLuc:N8 cLuc:P7A; N7                                      |                                                           |          |          |
| 0 vs. 0.1                                                 | No                                                        | ns                                                        | 0.0575   |          |
| 0 vs. 1                                                   | Yes                                                       | ****                                                      | < 0,0001 |          |
| 0 vs. 5                                                   | Yes                                                       | ****                                                      | < 0,0001 |          |
| Fig S5B                                                   | <b>One-way ANOVA; Dunnett's multiple comparisons test</b> |                                                           |          |          |
|                                                           | nLuc:N8 cLuc: P7A; P7A                                    |                                                           |          |          |
|                                                           | 0 vs. 0.1                                                 | Yes                                                       | **       | 0.009    |
|                                                           | 0 vs. 1                                                   | Yes                                                       | ****     | < 0,0001 |
|                                                           | 0 vs. 5                                                   | Yes                                                       | ****     | < 0,0001 |
|                                                           | nLuc:N8 cLuc: P7A; P7                                     |                                                           |          |          |
|                                                           | 0 vs. 0.1                                                 | Yes                                                       | ***      | 0.0003   |
|                                                           | 0 vs. 1                                                   | Yes                                                       | ****     | < 0,0001 |
|                                                           | 0 vs. 5                                                   | Yes                                                       | ****     | < 0,0001 |
|                                                           | nLuc:N8 cLuc:P7; N7                                       |                                                           |          |          |
| 0 vs. 0.1                                                 | No                                                        | ns                                                        | 0.1021   |          |
| 0 vs. 0.2                                                 | Yes                                                       | ****                                                      | < 0,0001 |          |
| 0 vs. 0.3                                                 | Yes                                                       | ****                                                      | < 0,0001 |          |
| Fig S5B                                                   | <b>One-way ANOVA; Dunnett's multiple comparisons test</b> |                                                           |          |          |
|                                                           | nLuc:N8 cLuc: P7; P7A                                     |                                                           |          |          |
|                                                           | 0 vs. 0.1                                                 | Yes                                                       | ***      | 0.0006   |
|                                                           | 0 vs. 0.2                                                 | Yes                                                       | ****     | < 0,0001 |
|                                                           | 0 vs. 0.3                                                 | Yes                                                       | ****     | < 0,0001 |
|                                                           | nLuc:N8 cLuc: P7; P7                                      |                                                           |          |          |
|                                                           | 0 vs. n (for all tested amounts)                          | Yes                                                       | ****     | < 0,0001 |
|                                                           | nLuc:N8 cLuc:P7SN; N7                                     |                                                           |          |          |
|                                                           | 0 vs. 0.1                                                 | No                                                        | ns       | 0.276    |
|                                                           | 0 vs. 0.2                                                 | Yes                                                       | ****     | < 0,0001 |
| 0 vs. 0.3                                                 | Yes                                                       | ****                                                      | < 0,0001 |          |
| Fig S5B                                                   | <b>One-way ANOVA; Dunnett's multiple comparisons test</b> |                                                           |          |          |
|                                                           | nLuc:N8 cLuc: P7SN; P7A                                   |                                                           |          |          |
|                                                           | 0 vs. 0.1                                                 | Yes                                                       | *        | 0.0167   |
|                                                           | 0 vs. 0.2                                                 | Yes                                                       | ****     | < 0,0001 |
|                                                           | 0 vs. 0.3                                                 | Yes                                                       | ****     | < 0,0001 |
|                                                           | nLuc:N8 cLuc: P7SN; P7                                    |                                                           |          |          |
|                                                           | 0 vs. n (for all tested amounts)                          | Yes                                                       | ****     | < 0,0001 |

| Figures                                                   | Test details                                              | Significance                                              | Summary  | P-value  |
|-----------------------------------------------------------|-----------------------------------------------------------|-----------------------------------------------------------|----------|----------|
| Fig 4D                                                    | <b>One-way ANOVA; Dunnett's multiple comparisons test</b> |                                                           |          |          |
|                                                           | TALE-A:N6:N8 N7:VP16, N5:KRAB                             |                                                           |          |          |
|                                                           | 0 vs. n (for all tested amounts)                          | Yes                                                       | ****     | < 0,0001 |
|                                                           | TALE-A:N6:N8 N7:VP16, P5A:KRAB                            |                                                           |          |          |
|                                                           | 0 vs. n (for all tested amounts)                          | Yes                                                       | ****     | < 0,0001 |
|                                                           | TALE-A:N6:N8 N7:VP16, P5:KRAB                             |                                                           |          |          |
|                                                           | 0 vs. n (for all tested amounts)                          | Yes                                                       | **       | 0.001    |
|                                                           | TALE-A:N6:N8 N7:VP16, P5SN:KRAB                           |                                                           |          |          |
|                                                           | 0 vs. n (for all tested amounts)                          | Yes                                                       | ****     | < 0,0001 |
|                                                           | Fig 4F                                                    | <b>One-way ANOVA; Dunnett's multiple comparisons test</b> |          |          |
| TALE-A:N6:N8 P7A:VP16, N7 <sup>NLS</sup> :KRAB            |                                                           |                                                           |          |          |
| 0 vs. n (for all tested amounts)                          |                                                           | Yes                                                       | ****     | < 0,0001 |
| <b>One-way ANOVA; Dunnett's multiple comparisons test</b> |                                                           |                                                           |          |          |
| - vs. 0                                                   |                                                           |                                                           |          |          |
| - vs. 10                                                  |                                                           | Yes                                                       | ****     | < 0,0001 |
| - vs. 30                                                  |                                                           | No                                                        | ns       | 0.2404   |
| - vs. 50                                                  |                                                           | No                                                        | ns       | 0.2701   |
| - vs. 70                                                  |                                                           | Yes                                                       | ***      | 0.0004   |
| Fig S6B                                                   |                                                           | <b>Paired t-test, two-tailed</b>                          |          |          |
|                                                           | TALE-A:N6 N5:VP16 vs. N7:VP16                             |                                                           |          |          |
|                                                           | Yes                                                       | ****                                                      | < 0,0001 |          |
|                                                           | TALE-A:N6 N8:VP16 vs. N7:VP16                             |                                                           |          |          |
|                                                           | Yes                                                       | ****                                                      | < 0,0001 |          |
|                                                           | <b>One-way ANOVA; Dunnett's multiple comparisons test</b> |                                                           |          |          |
|                                                           | TALE-A:N8 N7:VP16, N7 <sup>NLS</sup>                      |                                                           |          |          |
|                                                           | 0 vs. n (for all tested amounts)                          | Yes                                                       | ****     | < 0,0001 |
|                                                           | TALE-A:N8 N7:VP16, N7 <sup>NLS</sup>                      |                                                           |          |          |
|                                                           | 0 vs. n (for all tested amounts)                          | Yes                                                       | ****     | < 0,0001 |
| Fig S6C                                                   | <b>One-way ANOVA; Dunnett's multiple comparisons test</b> |                                                           |          |          |
|                                                           | TALE-A:N8 N7:VP16, N7 <sup>NLS</sup>                      |                                                           |          |          |
|                                                           | 0 vs. 10                                                  | No                                                        | ns       | 0.0638   |
|                                                           | 0 vs. 30                                                  | Yes                                                       | ****     | < 0,0001 |
|                                                           | 0 vs. 50                                                  | Yes                                                       | ****     | < 0,0001 |
|                                                           | <b>One-way ANOVA; Dunnett's multiple comparisons test</b> |                                                           |          |          |
|                                                           | TALE-A:N8 N7:VP16, N7 <sup>NLS</sup>                      |                                                           |          |          |
|                                                           | 0 vs. n (for all tested amounts)                          | Yes                                                       | ****     | < 0,0001 |
|                                                           | TALE-A:N8 P7A:VP16, N7 <sup>NLS</sup>                     |                                                           |          |          |
|                                                           | 0 vs. n (for all tested amounts)                          | Yes                                                       | ****     | < 0,0001 |
| Fig S6D                                                   | <b>One-way ANOVA; Dunnett's multiple comparisons test</b> |                                                           |          |          |
|                                                           | TALE-A:N8 N7:VP16, P7A <sup>NLS</sup>                     |                                                           |          |          |
|                                                           | 0 vs. 10                                                  | No                                                        | ns       | 0.086    |
|                                                           | 0 vs. 30                                                  | Yes                                                       | **       | 0.0011   |
|                                                           | 0 vs. 50                                                  | Yes                                                       | ***      | 0.0002   |
|                                                           | TALE-A:N8 P7A:VP16, P7A <sup>NLS</sup>                    |                                                           |          |          |
|                                                           | 0 vs. n (for all tested amounts)                          | Yes                                                       | ****     | < 0,0001 |
|                                                           | TALE-A:N8 P7:VP16, P7A <sup>NLS</sup>                     |                                                           |          |          |
|                                                           | 0 vs. n (for all tested amounts)                          | Yes                                                       | ****     | < 0,0001 |
|                                                           | TALE-A:N8 N7:VP16, P7 <sup>NLS</sup>                      |                                                           |          |          |
| 0 vs. 10                                                  | No                                                        | ns                                                        | 0.9364   |          |
| 0 vs. 30                                                  | No                                                        | ns                                                        | 0.0507   |          |
| 0 vs. 50                                                  | Yes                                                       | **                                                        | 0.0018   |          |
| Fig S6F                                                   | <b>One-way ANOVA; Dunnett's multiple comparisons test</b> |                                                           |          |          |
|                                                           | TALE-A:N8 P7A:VP16, P7 <sup>NLS</sup>                     |                                                           |          |          |
|                                                           | 0 vs. n (for all tested amounts)                          | Yes                                                       | ****     | < 0,0001 |
|                                                           | TALE-A:N8 P7:VP16, P7 <sup>NLS</sup>                      |                                                           |          |          |
|                                                           | 0 vs. n (for all tested amounts)                          | Yes                                                       | ****     | < 0,0001 |
|                                                           | <b>One-way ANOVA; Dunnett's multiple comparisons test</b> |                                                           |          |          |
|                                                           | TALE-A:N8 N7:VPR                                          |                                                           |          |          |
|                                                           | - vs. N5:KRAB                                             | Yes                                                       | ****     | < 0,0001 |
|                                                           | - vs. P5A:KRAB                                            | Yes                                                       | ****     | < 0,0001 |
|                                                           | - vs. P5:KRAB                                             | Yes                                                       | ****     | < 0,0001 |
| - vs. P5SN:KRAB                                           | Yes                                                       | ****                                                      | < 0,0001 |          |
| Fig 5B                                                    | <b>Paired t-test, two-tailed</b>                          |                                                           |          |          |
|                                                           | nLuc:N8 cLuc:N7 vs. nLuc:P8A cLuc:P7A                     |                                                           |          |          |
|                                                           | No                                                        | ns                                                        | 0.8335   |          |
|                                                           | <b>One-way ANOVA; Dunnett's multiple comparisons test</b> |                                                           |          |          |
|                                                           | Spike nLuc:P8A, TMRSS2 ACE2 cLuc:P7A, Camostat            |                                                           |          |          |
|                                                           | 0 vs. n (for all tested amounts)                          | Yes                                                       | ****     | < 0,0001 |
|                                                           | <b>One-way ANOVA; Dunnett's multiple comparisons test</b> |                                                           |          |          |
|                                                           | Spike nLuc:P8A, TMRSS2 ACE2 cLuc:P7A, RBD                 |                                                           |          |          |
|                                                           | 0 vs. n (for all tested amounts)                          | Yes                                                       | ****     | < 0,0001 |

**Table S4.** The list of plasmids used in this study.

| Plasmid name (amino acid sequence)                                                                                                                                                                                                                                                                                                                                                                                                                                                                                                                                                                                                                                                                                        |
|---------------------------------------------------------------------------------------------------------------------------------------------------------------------------------------------------------------------------------------------------------------------------------------------------------------------------------------------------------------------------------------------------------------------------------------------------------------------------------------------------------------------------------------------------------------------------------------------------------------------------------------------------------------------------------------------------------------------------|
| <b>Myc:N7</b><br>M <b>EQKLISEEDL</b> GEIAALEAKNAALKAEIAALEAKIAALKAGY*<br>red: Myc tag; black: N7                                                                                                                                                                                                                                                                                                                                                                                                                                                                                                                                                                                                                          |
| <b>Myc:P7A</b><br>M <b>EQKLISEEDL</b> GEIAALEAKNAALKAEIAALEAKNAALKAGC*<br>red: Myc tag; black: P7                                                                                                                                                                                                                                                                                                                                                                                                                                                                                                                                                                                                                         |
| <b>Myc:P7</b><br>M <b>EQKLISEEDL</b> EIQALEEKNAQLKQEI AALEEKNQALKYG*<br>red: Myc tag; black: P7                                                                                                                                                                                                                                                                                                                                                                                                                                                                                                                                                                                                                           |
| <b>Myc:P7SN</b><br>M <b>EQKLISEEDL</b> EIQQLEEKNSQLKQEI SLEEKNQELKYG*<br>red: Myc tag; black: P7SN                                                                                                                                                                                                                                                                                                                                                                                                                                                                                                                                                                                                                        |
| <b>Myc:N7Q</b><br>M <b>EQKLISEEDL</b> GEIAALEQKNAALKQEI AALEQKIAALKQGC*<br>red: Myc tag; black: N7Q                                                                                                                                                                                                                                                                                                                                                                                                                                                                                                                                                                                                                       |
| <b>N7:gs linker:cLuc:gs linker:HA</b><br>M GEIAALEAKNAALKAEIAALEAKIAALKAGY GSGGGSGGS <b>TMTEKEIVDYVASQVTTAKKLRGGVVFVDEVPKGLTGKLDARKIREILIKAKKGGKIAVNS</b> GSG<br><b>YPYDVPDYA</b> *<br>black: N7; dark blue: gs linker; yellow: C terminal of split Luciferase cLuc; green:HA tag                                                                                                                                                                                                                                                                                                                                                                                                                                         |
| <b>N7Q:gs linker:cLuc:gs linker: HA</b><br>M GEIAALEQKNAALKQEI AALEQKIAALKQGC GSGGGSGGS <b>TMTEKEIVDYVASQVTTAKKLRGGVVFVDEVPKGLTGKLDARKIREILIKAKKGGKIAVNS</b> GSG<br><b>YPYDVPDYA</b> *<br>black: N7Q; dark blue: gs linker; yellow: C terminal of split Luciferase cLuc; green:HA tag                                                                                                                                                                                                                                                                                                                                                                                                                                     |
| <b>P7A:gs linker:cLuc:gs linker:HA</b><br>M GEIAALEAKNAALKAEIAALEAKNAALKAGC GSGGGSGGS <b>TMTEKEIVDYVASQVTTAKKLRGGVVFVDEVPKGLTGKLDARKIREILIKAKKGGKIAVN</b> SGSG<br><b>YPYDVPDYA</b> *<br>black: P7A; dark blue: gs linker; yellow: C terminal of split Luciferase cLuc; green:HA tag                                                                                                                                                                                                                                                                                                                                                                                                                                       |
| <b>P7:gs linker:cLuc:gs linker:HA</b><br>M EIQALEEKNAQLKQEI AALEEKNQALKYG GSGGGSGGS <b>TMTEKEIVDYVASQVTTAKKLRGGVVFVDEVPKGLTGKLDARKIREILIKAKKGGKIAVN</b> SGSG<br><b>YPYDVPDYA</b> *<br>black: P7; dark blue: gs linker; yellow: C terminal of split Luciferase cLuc; green:HA tag                                                                                                                                                                                                                                                                                                                                                                                                                                          |
| <b>P7SN:gs linker:cLuc:gs linker:HA</b><br>M EIQQLEEKNSQLKQEI SLEEKNQELKYG GSGGGSGGS <b>TMTEKEIVDYVASQVTTAKKLRGGVVFVDEVPKGLTGKLDARKIREILIKAKKGGKIAVN</b> SGSG<br><b>YPYDVPDYA</b> *<br>black: P7SN; dark blue: gs linker; yellow: C terminal of split Luciferase cLuc; green:HA tag                                                                                                                                                                                                                                                                                                                                                                                                                                       |
| <b>cLuc:Myc:N7</b><br>M <b>TMTEKEIVDYVASQVTTAKKLRGGVVFVDEVPKGLTGKLDARKIREILIKAKKGGKIAVNS</b> <b>EQKLISEEDL</b> GEIAALEAKNAALKAEIAALEAKIAALKAGY<br>yellow: C terminal of split Luciferase cLuc; red: Myc tag; dark blue: gs linker; black: N7                                                                                                                                                                                                                                                                                                                                                                                                                                                                              |
| <b>cLuc:Myc: N7Q</b><br>M <b>TMTEKEIVDYVASQVTTAKKLRGGVVFVDEVPKGLTGKLDARKIREILIKAKKGGKIAVNS</b> <b>EQKLISEEDL</b> GEIAALEQKNAALKQEI AALEQKIAALKQGC<br>yellow: C terminal of split Luciferase cLuc; red: Myc tag; dark blue: gs linker; black: N7                                                                                                                                                                                                                                                                                                                                                                                                                                                                           |
| <b>cLuc:Myc: P7A</b><br>M <b>TMTEKEIVDYVASQVTTAKKLRGGVVFVDEVPKGLTGKLDARKIREILIKAKKGGKIAVN</b> <b>EQKLISEEDL</b> GEIAALEAKNAALKAEIAALEAKNAALKAGC<br>yellow: C terminal of split Luciferase cLuc; red: Myc tag; dark blue: gs linker; black: N7                                                                                                                                                                                                                                                                                                                                                                                                                                                                             |
| <b>cLuc:Myc: P7</b><br>M <b>TMTEKEIVDYVASQVTTAKKLRGGVVFVDEVPKGLTGKLDARKIREILIKAKKGGKIAVN</b> <b>EQKLISEEDL</b> EIQALEEKNAQLKQEI AALEEKNQALKYG<br>yellow: C terminal of split Luciferase cLuc; red: Myc tag; dark blue: gs linker; black: N7                                                                                                                                                                                                                                                                                                                                                                                                                                                                               |
| <b>cLuc:Myc: P7SN</b><br>M <b>TMTEKEIVDYVASQVTTAKKLRGGVVFVDEVPKGLTGKLDARKIREILIKAKKGGKIAVN</b> <b>EQKLISEEDL</b> EIQQLEEKNSQLKQEI SLEEKNQELKYG<br>yellow: C terminal of split Luciferase cLuc; red: Myc tag; dark blue: gs linker; black: N7                                                                                                                                                                                                                                                                                                                                                                                                                                                                              |
| <b>nLuc:myc:gs linker:N8</b><br>M GSGEDAKNIKKGPAPFY PLEDGTAGEQLHKAMKRYALVPGTIAFTDAHIEVDITYAEYFEMSVRLAEAMKRYGLNTNHRIVVCSSENSLQFFMPVGLGALFIGVAVAPAND<br>IYNERELNLSMGI SQPTVVVFSKGLQKILNVQKLP I IQKIIIMDSKTDYQGFSMYT FVTSHLPPGFNEYDFVPESFDRDKTIALIMNSSGSTGLPKGVALPHRTACV<br>RFSHARDPIFGNQIIPDPTAILSVVFFHGFMTTLGYLICGFRVVMYRFEELFLRSLQDYKIQSALLVPTLFSFFAKSTLIDKYDLSNLHEIASGGAPLSKEVGEAV<br>AKRFHLPGIRQGYGLTETTSAILITPEGDDKPGAVGVVFFFEAKVVDLDTGKTLGVNQRGELCVRGPMIMSGYVNNPEATNALIDKDGWLHSGDIAYWDEDEHFFIVDR<br>LKSILIKYGYQVAPAELESILQHPNIFDAGVAGLPDDDAGELPAAVVLEHGK <b>EQKLISEEDL</b> GSGSG YGKIAALKAENAALAEAKIAALKAEIAALEAGY*<br>purple: N terminal of split luciferase nLuc; red: Myc tag; dark blue: gs linker; black: N8     |
| <b>N8:myc: gs linker:nLuc</b><br>M YGKIAALKAENAALAEAKIAALKAEIAALEAGY <b>EQKLISEEDL</b> GSGGGSGG<br>EDAKNIKKGPAPFY PLEDGTAGEQLHKAMKRYALVPGTIAFTDAHIEVDITYAEYFEMSVRLAEAMKRYGLNTNHRIVVCSSENSLQFFMPVGLGALFIGVAVAPANDIYNE<br>RELNLSMGI SQPTVVVFSKGLQKILNVQKLP I IQKIIIMDSKTDYQGFSMYT FVTSHLPPGFNEYDFVPESFDRDKTIALIMNSSGSTGLPKGVALPHRTACVRF<br>SHARDPIFGNQIIPDPTAILSVVFFHGFMTTLGYLICGFRVVMYRFEELFLRSLQDYKIQSALLVPTLFSFFAKSTLIDKYDLSNLHEIASGGAPLSKEVGEAV<br>AKRFHLPGIRQGYGLTETTSAILITPEGDDKPGAVGVVFFFEAKVVDLDTGKTLGVNQRGELCVRGPMIMSGYVNNPEATNALIDKDGWLHSGDIAYWDEDEHFFIVDR<br>LKSILIKYGYQVAPAELESILQHPNIFDAGVAGLPDDDAGELPAAVVLEHGK*<br>purple: N terminal of split luciferase nLuc; red: Myc tag; dark blue: gs linker; black: N8 |
| <b>His:TAL-E-A:NLS:gs linker:N8</b><br>M HHHHHH<br>DYKDHGDGDKDHDIDYKDDDDKMAPKKKRVGIHRGVMVDLRTLGSQQQEQEIKPKVRSVTAQHHEALVGHGFTHAHIVALSQHPAALGTAVVYQDMIAALPEATHE<br>AIVGVGKQWSGARALEALLTVAGELRGPPLQLDTGQLLKIARGGVTAVEAVHWRNALTGAPLNLTPDQVVAIASNGGGKQALETVQRLLPVLCDHGLTPEQVVAIAS<br>NGGGKQALETVQRLLPVLCDHGLTTPDQVVAIASNIGGKQALETVQRLLPVLCDHGLTTPDQVVAIASHDDGGKQALETVQRLLPVLCDHGLTTPDQVVAIASNGGGKQAL                                                                                                                                                                                                                                                                                                                           |



M GETAALEAKIAALKAKNAALKAETIAALEAGY GSGGGSGGS **DPKKRRKV**  
**APPTDVS LGDELHLDGEDVAMAHADALDDFDLMLDGDGSPGPGFTPHDSAPYGALDMADFEFEQMFDTALGIDEYGG DTYRYI\***  
 black:N5; dark blue:gs linker; **cian: nuclear localization sequence**; dark green VP16 activation domain; light green: AU1 tag

**P5A: gs linker:NLS:VP16:AU1**

M ENAALEAKIAALKAKNAALKAETIAALEAGY GSGGGSGGS **DPKKRRKV**  
**APPTDVS LGDELHLDGEDVAMAHADALDDFDLMLDGDGSPGPGFTPHDSAPYGALDMADFEFEQMFDTALGIDEYGG DTYRYI\***  
 black:P5A; dark blue:gs linker; **cian: nuclear localization sequence**; dark green VP16 activation domain; light green: AU1 tag

**P5: gs linker:NLS:VP16:AU1**

M SPEDENAALKEEIAQLKQKNAALKEEIQALEY GSGGGSGGS **DPKKRRKV**  
**APPTDVS LGDELHLDGEDVAMAHADALDDFDLMLDGDGSPGPGFTPHDSAPYGALDMADFEFEQMFDTALGIDEYGG DTYRYI\***  
 black:P5; dark blue:gs linker; **cian: nuclear localization sequence**; dark green VP16 activation domain; light green: AU1 tag

**P5SN: gs linker:NLS:VP16:AU1**

M ENSQLEEKISQLKQKNSLKEEIQLE GSGGGSGGS **DPKKRRKV**  
**APPTDVS LGDELHLDGEDVAMAHADALDDFDLMLDGDGSPGPGFTPHDSAPYGALDMADFEFEQMFDTALGIDEYGG DTYRYI\***  
 black:CC; dark blue:gs linker; **cian: nuclear localization sequence**; dark green VP16 activation domain; light green: AU1 tag

**Myc:N5<sup>NLS</sup>**

M **EQKLISEEDL** GEIAALEAKIAALKAKNAALKAETIAALEAGY **DPKKRRKV\***  
 red: Myc tag; Black: N5; **cian: nuclear localization sequence**

**Myc:P5A<sup>NLS</sup>**

M **EQKLISEEDL** ENAALEAKIAALKAKNAALKAETIAALEAGY **DPKKRRKV\***  
 red: Myc tag; Black: P5A; **cian: nuclear localization sequence**

**Myc:P5<sup>NLS</sup>**

M **EQKLISEEDL** SPEDENAALKEEIAQLKQKNAALKEEIQALEY **DPKKRRKV\***  
 red: Myc tag; Black: P5; **cian: nuclear localization sequence**

**Myc:P5SN<sup>NLS</sup>**

M **EQKLISEEDL** ENSQLEEKISQLKQKNSLKEEIQLE **DPKKRRKV\***  
 red: Myc tag; Black: P5SN; **cian: nuclear localization sequence**

**Myc:N5:KRAB**

M **EQKLISEEDL** GEIAALEAKIAALKAKNAALKAETIAALEAGY **DPKKRRKV**  
**PKKKRKVDGGGALSPQHSAVTQGSIIKKNKEMDAKSLTAWSRVLVTFKDVVDFTRREWKLDDTAQQIVYRNVMLNENKLVSLGYQLTKPDVILRLEKGEPPWLVEREI**  
**HQETHPDSETAFEIKSSV DTYRYI\***  
 red: Myc tag; Black: N5; **cian: nuclear localization sequence**; orange: KRAB suppressino domain; light green: AU1 tag

**Myc:P5A:KRAB**

M **EQKLISEEDL** ENAALEAKIAALKAKNAALKAETIAALEAGY **DPKKRRKV**  
**PKKKRKVDGGGALSPQHSAVTQGSIIKKNKEMDAKSLTAWSRVLVTFKDVVDFTRREWKLDDTAQQIVYRNVMLNENKLVSLGYQLTKPDVILRLEKGEPPWLVEREI**  
**HQETHPDSETAFEIKSSV DTYRYI\***  
 red: Myc tag; Black: P5A; **cian: nuclear localization sequence**; orange: KRAB suppressino domain; light green: AU1 tag

**Myc:P5:KRAB**

M **EQKLISEEDL** SPEDENAALKEEIAQLKQKNAALKEEIQALEY **DPKKRRKV**  
**PKKKRKVDGGGALSPQHSAVTQGSIIKKNKEMDAKSLTAWSRVLVTFKDVVDFTRREWKLDDTAQQIVYRNVMLNENKLVSLGYQLTKPDVILRLEKGEPPWLVEREI**  
**HQETHPDSETAFEIKSSV DTYRYI\***  
 red: Myc tag; Black: P5; **cian: nuclear localization sequence**; orange: KRAB suppressino domain; light green: AU1 tag

**Myc:P5SN:KRAB**

M **EQKLISEEDL** ENSQLEEKISQLKQKNSLKEEIQLE **DPKKRRKV**  
**PKKKRKVDGGGALSPQHSAVTQGSIIKKNKEMDAKSLTAWSRVLVTFKDVVDFTRREWKLDDTAQQIVYRNVMLNENKLVSLGYQLTKPDVILRLEKGEPPWLVEREI**  
**HQETHPDSETAFEIKSSV DTYRYI\***  
 red: Myc tag; Black: P5SN; **cian: nuclear localization sequence**; orange: KRAB suppressino domain; light green: AU1 tag

**His:TAL-A:NLS:gs linker:N6 (TAL-A:N6)**

M HHHHHH  
 DYKDHGDYKDHDIDYKDDDDKMAPKKRRKVGIRHGVPMVLDLRTLGYSQQQQEKIKPKVRSVTAQHHEALVGHGFTHAHIVALSQHPAALGTAVVKYQDMIAALPEATHE  
 AIVGVGKQWSGARALEALLTVAGELRGPPLQDLDLTKIAKRGVTAVEAVHWRNALTGAPLNLTDPQVVAIASNGGGKQALETVQRLLPVLCDHGLTPEQVVAIAS  
 NNGGKQALETVQRLLPVLCDHGLTPEQVVAIASNIGGKQALETVQRLLPVLCDHGLTPEQVVAIASHDDGGKQALETVQRLLPVLCDHGLTPEQVVAIASNIGGKQAL  
 ETVQRLLPVLCDHGLTPEQVVAIASNNGGKQALETVQRLLPVLCDHGLTPEQVVAIASHDDGGKQALETVQRLLPVLCDHGLTPEQVVAIASNIGGKQALETVQRLLP  
 VLCDHGLTPEQVVAIASNNGGKQALETVQRLLPVLCDHGLTPEQVVAIASHDDGGKQALETVQRLLPVLCDHGLTPEQVVAIASNIGGKQALETVQRLLPVLCDHGLT  
 TPAQVVAIASHDDGGKQALETVQRLLPVLCDHGLTPEQVVAIASHDDGGKQALETVQRLLPVLCDHGLTPEQVVAIASHDDGGKQALETVQRLLPVLCDHGLTPEQVVAI  
 ANNGGKQALETVQRLLPVLCDHGLTPEQVVAIASHDDGGKQALETVQRLLPVLCDHGLTPEQVVAIASNIGGKQALETVQRLLPVLCDHGLTPEQVVAIASNIGGKQALETVQRLLP  
 ALDAVKKGLPHAPALIKRTNRRIPERTSHRVAGS **DPKKRRKV** GSGGGSGGS KIAALKAETIAALEAENAALEAKIAALKAG\*  
 magenta: his tag; orange: TALA; dark blue: gs linker; **cian: nuclear localization sequence**; black: N6

**His:TAL-A:NLS:gs linker:N6:linker:N8 (TAL-A:N6:N8)**

M HHHHHH  
 DYKDHGDYKDHDIDYKDDDDKMAPKKRRKVGIRHGVPMVLDLRTLGYSQQQQEKIKPKVRSVTAQHHEALVGHGFTHAHIVALSQHPAALGTAVVKYQDMIAALPEATHE  
 AIVGVGKQWSGARALEALLTVAGELRGPPLQDLDLTKIAKRGVTAVEAVHWRNALTGAPLNLTDPQVVAIASNGGGKQALETVQRLLPVLCDHGLTPEQVVAIAS  
 NNGGKQALETVQRLLPVLCDHGLTPEQVVAIASNIGGKQALETVQRLLPVLCDHGLTPEQVVAIASHDDGGKQALETVQRLLPVLCDHGLTPEQVVAIASNIGGKQAL  
 ETVQRLLPVLCDHGLTPEQVVAIASNNGGKQALETVQRLLPVLCDHGLTPEQVVAIASHDDGGKQALETVQRLLPVLCDHGLTPEQVVAIASNIGGKQALETVQRLLP  
 VLCDHGLTPEQVVAIASNNGGKQALETVQRLLPVLCDHGLTPEQVVAIASHDDGGKQALETVQRLLPVLCDHGLTPEQVVAIASNIGGKQALETVQRLLPVLCDHGLT  
 TPAQVVAIASHDDGGKQALETVQRLLPVLCDHGLTPEQVVAIASHDDGGKQALETVQRLLPVLCDHGLTPEQVVAIASHDDGGKQALETVQRLLPVLCDHGLTPEQVVAI  
 ANNGGKQALETVQRLLPVLCDHGLTPEQVVAIASHDDGGKQALETVQRLLPVLCDHGLTPEQVVAIASNIGGKQALETVQRLLPVLCDHGLTPEQVVAIASNIGGKQALETVQRLLP  
 ALDAVKKGLPHAPALIKRTNRRIPERTSHRVAGS **DPKKRRKV** GSGGGSGGS KIAALKAETIAALEAENAALEAKIAALKAG GSGGGSGGS  
 YKIAALKAENAALEAKIAALKAETIAALEAGC\*  
 magenta: his tag; orange: TALA; dark blue: gs linker; **cian: nuclear localization sequence**; black: N6 and N8

**CoV-2 Spike-protein**

M  
 FLLTTRKTRMFVFLVLLPLVSSQCVNLTTRTQLPPAYTNSFTRGVYYPDKVFRSSVLHSTQDLFLFFSNVTFWFAIHVSGTNGTKRFDNPVLPFNDGVYFASTEKSNIIR  
 GWIFGTTLDLSTQSLVIVNNAATNVVIVKCEPFCNDPFLGVYHKNKSWMESEFRVYSSANNCTFEYVSQFFLMDLEGKQGNFKNLREVFKNIDGYFKIYKHTPINLV  
 RDLPPQGFSALEPLVDLPIGINITRFQTLALHRSYLTPEGSSSGWTAAGAAAYVGYLQPRFTLLKYNENGTITDAVDCALDPLSETKCTKLSFTVEKGIYQTSNFRVQPT  
 ESIVRFNITNLCPFGEVFNATRFASVYAMNRRKRSNCVADYSVLYNSASFSTFKCYGVSPSTKLNLDLCTNRYVDSFVIRGDEVKQIAPGQTKIADYNYKLPDDFTGCV  
 IAWNSNNLDSKVGNNYLYLRFKSNLKPFFERDISTEIQAGSTPCNGVEGFNCFYFPLQSYGFPQTPNGVGYQYPRVYVLLSFELLHAPATVCGPKKSNLVKNCVNFNF

NGLTGTGVLTESNKKFLPFQQFGRDIADTTDAVRDPQTFLEILDITPCSFGGVSVITPGTNTSNQVAVLYQDVNCTEVPVAIHADQLTPTWRVYSTGSNVFQTRAGCLIGA  
EHVNNSYECDIPIGA  
GICASYQTQNTSPRRARSVASQSI IAYTMSLGAENSVAYSNNISIAIPTNFTISVTEILPVSMTKTSVDCTMYICGDSSTECNLLQYGSFCTQLNRALTGIAVEQDKNT  
QEVFAQVKQIYKTPPIKDFGGFNFSQILPDPSPKSKRSFIEDLLFNKVTLADAGFIKQYGDCLGDIAARDLICAQKFNGLTVLPPLLTDEMIAQYTSALLAGTITSGWTF  
GAGAAALQIPFAMQAYRFNENGIQVTVNLYENQKLIANQFNSAIGKIQDSLSTASALGKLDQDVVNQNAQALNTLVKQLSSNFGALSSVNDILSRLDKVEAEVQIDRLIT  
GRLQSLQTYVTQQLIRAAEIRASANLAATKMECVLGGQSKRVDFCGKGYHLMSPQSAPHGVVFLHVTYVPAQEKNFTTAPAICHGDKAHFPRGCVFVSNGTHWFVTQRN  
FYEPQIITDNTFVSGNCDVVIGIVNNTVYDPLQPELDSFKEELDKEYFNKHTSPDVLGDIGSINASVVNIQKEIDRLNEVAKNLNESLIDLQELGKYEYQYIKWPWYIWL  
GFIAGLIAIMVMTMLCCMTSCCCSCLGKCCSCGSCCKFDEDDSEFVLKGVKLHYT\*

Dark red: S1; blue: S2

## hACE2

MSSSSWLLLSLVAVTAQSTIEEQAKTFLDKFNHEAEDLFYQSSLASWNYNTNI TEENVQNMNAGDKWSAFLKEQSTLAQMYPLQEIQNLTVKQLQALQNGSSVLSLE  
DKSKRLNTILNMTSTIYSTGKVCNPDNPQECLELLEPGLNEIMANSLDYNERLWAWESWRSEVVGKQLRPLYEEYVVLKNEMARANHYEDYGDYWRGDYEVNGVDGYDYSRG  
QLIEDVEHTFEEIKPLYEHLHAYVRAKLMNAYPSYISPIGCLPAHLLGDMWGRFTNLYSLTVFPFGQKPNIDVTDAMVDQAWDAQRI FKEAEKFVSVGLPNMTQGFENWEN  
SMLTDPGNVQKAVCHPTAWDLGKGDRIILMCTKVTMDDFLTAHHEMGIQYDMAYAAQPFLLRNGANEGFHEAVEGIMLSAATPKHLKSIIGLLSPDFQEDNETEINFL  
KQALTI VGTLPFTYMLEKWRVMVFKGEIPKQWMMKWWEMKREIVGVVEPVPHDETYCDPASLFHVSNDYSFIRYTRTLTYQFQFQALCQAQAKHEGPHKCDISNSTEA  
GQKLFNMLRLGKSEPWTLALENVVGAKNMNVRLNLYFEPLFTWLKDNKNSFVGVSTDWSPYADQSIKVRISLSKALGDKAYEWNNDNEMYLFRRSSVAYAMRQYFLKVK  
QMILFGEEDVRVANLKPRI SFNFVTPAPKNVSDIIPRTEVEKAI RMRSRINDAFRLNDNSLEFLGIQPTLGPNNQPPVSIWLVIFVGVVMGVIVVIGIVLIFTGIRDRKK  
KNKARSGENPYASIDISKGENNPGFQNTDDVQTSF\*

## hTMPRSS2 (SinoBiological)

MALNSGSPPAIGPYENHGYQENPYPAQPTVVVTVYEVHPAQYPSVPVQYAPRVLTAQSNPVVCTQPKSPSGTVCTSKTKKALCITLTLGTLVGAALAAGLLWKFMG  
SKCSNSGIECDSSGTCINPSNWCDDGVSHCPGGEDENRCVRLYGPNFILQVYSSQRKSWHPVQCDWNNENYGRAACRDMGYKNFYSSQGI VDDSGSTSFMKLNLSAGNVD  
IYKLYHSDACSSKAVVSLRCIACGVNLNSRQSRIVGGESALPGAWPQVSLHVQNVHVCSSGSIITPEWIVTAAHCVEKPLNNPWHHTAFAGILRQSFMYGAGYQVEK  
VISHPNYDSKTKNNDIALMKLQKPLTFNDLVKPVCLNPGMMLQPEQLCWI SGWGATEEKGTSEVLNAAKVLLETQRCSRYVDNLIPTAMICAGFLQGNVDSQCGD  
SGGPLVTSKNNIWWLIGDTSWGGCAKAYRPGVYGNVMVFTDWIYRQMRADG GGGG EQKLISEEDL\*

Black: hMPRSS2; dark blue: gs linker; red: Myc tag

## GFP<sub>1-10</sub>:gs linker:N7 (GFP<sub>1-10</sub>:N7)

SKGEELFTGVVPIVVELDGDVNGHKFSVRGEGEGDATIGKLTGKLFICTTGKLPVWPPTLVTTLYGVQCFSRYPDHMKRHDFFKSAMPEGYVQERTISFKDDGKYKTRAV  
VKFEGDTLVNRIELKGTDFKEDGNILGHKLEYNFNHNVYITADKQKNGIKANFTVRHNVEDGVSQVLADHYQONTPIGDGPVLLPDNHYLSTQTVLSKDPNEKSGSGSGS  
GSSGGSGSGEIAALEAKNAALKAIEIAALEAKIAALKAGY\*

Green: GFP(1-10); dark blue: gs Linker; black:N7

## GFP<sub>1-10</sub>:gs linker:P7 (GFP<sub>1-10</sub>:P7)

SKGEELFTGVVPIVVELDGDVNGHKFSVRGEGEGDATIGKLTGKLFICTTGKLPVWPPTLVTTLYGVQCFSRYPDHMKRHDFFKSAMPEGYVQERTISFKDDGKYKTRAV  
VKFEGDTLVNRIELKGTDFKEDGNILGHKLEYNFNHNVYITADKQKNGIKANFTVRHNVEDGVSQVLADHYQONTPIGDGPVLLPDNHYLSTQTVLSKDPNEKSGSGSGS  
GSSGGSGSGEIQALEEKNALQKQIEIAALEEKNQALKYG\*

Green: GFP(1-10); dark blue: gs Linker; black:P7

## HisN8:gs linker:GFP<sub>11</sub> (N8:GFP<sub>11</sub>)

M HHHHHH YGKIAALKAENAALKAIAALKAIEIAALEAGY GSGGGSG RDHMLVHEYVNAAGIT

magenta: his tag; dark blue: gs linker; black: N8; green: GFP11;

## HisP8:gs linker:GFP<sub>11</sub> (P8:GFP<sub>11</sub>)

M HHHHHH KIAQLKE ENQQLQ KIQALKE ENAALEY GSGGGSG RDHMLVHEYVNAAGIT

magenta: his tag; dark blue: gs linker; black: P8; green: GFP11

## His(N8:gs linker:GFP<sub>11</sub>)<sub>3</sub> (3×(N8:GFP<sub>11</sub>))

M HHHHHH YGKIAALKAENAALKAIAALKAIEIAALEAGY GSGGGSG RDHMLVHEYVNAAGIT GSGGGSG YGKIAALKAENAALKAIAALKA IEIAALEAGY

GSGGGSG RDHMLVHEYVNAAGIT GSGGGSG YGKIAALKAENAALKAIAALKAIEIAALEAGY GSGGGSG RDHMLVHEYVNAAGIT

magenta: his tag; dark blue: gs linker; black: N8; green: GFP11
